# Supplementary material for: C4, the Pathogenic Determinant of Tomato Leaf Curl Guangdong Virus, May Suppress Post-transcriptional Gene Silencing by Interacting With BAM1 Protein
Source: PubMed Central journal article supplement (PMC7215500; doi:10.3389/fmicb.2020.00851), 2020-05-05
Supplement: Presentation_1.pdf [file Presentation_1.pdf]

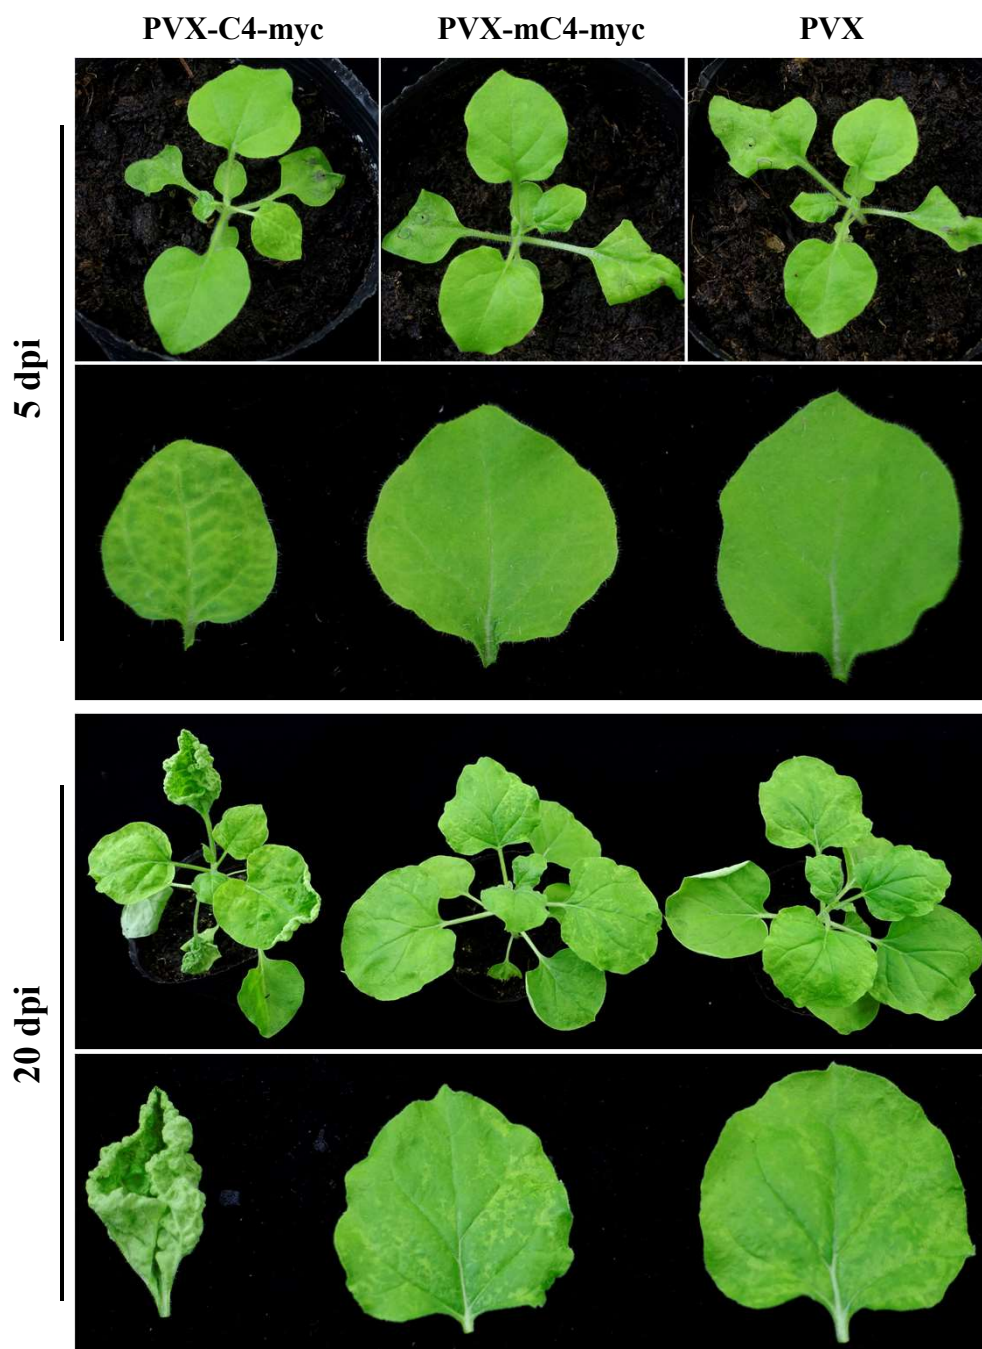

**Supplementary Figure 1** Symptoms of *N. benthamiana* infected by PVX-C4-myc, PVX-mC4-myc, and PVX at different times.

|            |                                  |    |
|------------|----------------------------------|----|
| ToLCGdV C4 | ..MGTLISTCLCN SKANTTARITDSSTWFP  | 28 |
| TYLCV C4   | ..MGNHISMCLSN SKANTNVRTNGSSTWYP  | 28 |
| MYMV AC4   | MK MENLISMFCFNSKGS SKRRTQGSSTWFP | 30 |
| ToLCGdV C4 | QPDQHISIRTFRELNPAPMSSPTSIRMETSE  | 58 |
| TYLCV C4   | QTGOHISIRTFRQLRAQQMSRPTWRKTETS   | 58 |
| MYMV AC4   | QQDQHITIRTFRQLKAHQMLSHTWTKTETS   | 60 |
| ToLCGdV C4 | LNGVNSRSTDEVLG EAARMLTTHVQRL...  | 85 |
| TYLCV C4   | LILEFPKSMADQLEEVS NLPTTHMPKHSIQ  | 88 |
| MYMV AC4   | LTMEVSKSMADQLEEVS NLPTTLMPRHSIV  | 90 |
| ToLCGdV C4 | .....                            | 85 |
| TYLCV C4   | AVNPRPSIY                        | 97 |
| MYMV AC4   | DPSYRPSIY                        | 99 |

## Supplementary Figure 2 Amino acids alignment of AC4/C4 of ToLCGdV, TYLCV, and MYMV

The GenBank accession numbers are AAU00332 (ToLCGdV C4) CAA33691 (TYLCV C4), and QDN53931 (MYMV AC4)
